# Supplementary material for: Identifying children with excess malaria episodes after adjusting for variation in exposure: identification from a longitudinal study using statistical count models
Source: Springer Nature journal article supplement (doi:10.1186/s12916-015-0422-4), 2015-08-06
Supplement: MOESM1 [file 9758994]

### Final Zero Inflated Model model

| Covariates (generated from mfp nbr model)                          | Incident Rate Ratio | P      | 95% Confidence Interval |
|--------------------------------------------------------------------|---------------------|--------|-------------------------|
| $(\text{Exposure Index} + 2.30e-17) - 0.43$                        | 14.75               | 0.0001 | 8.31 – 26.71            |
| $((\text{Exposure Index} + 2.30e-17))^3 - 0.08$                    | 0.27                | 0.0001 | 0.19 - 0.41             |
| $(\text{Age} + 1)/10^{0.5} - 0.77$                                 | 102.12              | 0.0001 | 36.12 – 288.66          |
| $(\text{age} + 1)/10^{0.5} * \ln(\text{age\_block} + 1)/10 + 0.40$ | 0.02                | 0.0001 | 0.01 - 0.04             |
| Calender year-2006.871542                                          | 1.03                | 0.0001 | 1.02 – 1.04             |
| $\ln(\text{Age} * \text{Exposure Index} + 1.73e-18)/10 + 1.48$     | 0.89                | 0.0001 | 0.87 – 0.92             |
| $\ln(\text{Age} * \text{Exposure Index} + 1.73e-18)/10^2 - 2.20$   | 0.99                | 0.0001 | 0.996 - 0.998           |
| Inflate                                                            |                     |        |                         |
| Exposure Index                                                     | -2.40               | 0.005  | -4.07 – -0.74           |
| Lalpha                                                             | -0.46               | 0.032  | -0.88 - -0.04           |
| Alpha                                                              | 0.62                |        | 0.41 – 0.96             |

Footnote: Age is in years, Exposure index is a weighted prevalence scale ranging from 0 to 1.
