# Supplementary material for: Identifying children with excess malaria episodes after adjusting for variation in exposure: identification from a longitudinal study using statistical count models
Source: Springer Nature journal article supplement (doi:10.1186/s12916-015-0422-4), 2015-08-06
Supplement: MOESM2 [file 9758994]

**A comparison of the numbers of EM as classified by simple cut-offs or by the negative binomial model**

| Arbitrary cut off                                                                                                     | >5 | >6 | >7 | >8 | >9 | >10 |
|-----------------------------------------------------------------------------------------------------------------------|----|----|----|----|----|-----|
| Number of children with episodes less than the simple threshold, but classified as EM by the model                    | 3  | 10 | 27 | 36 | 63 | 95  |
| Number of children with episodes more than the simple threshold, but not classified as EM by the model                | 64 | 29 | 11 | 1  | 0  | 0   |
| This table illustrates how simple/arbitrary cut-offs of excess malaria compare with the zero inflated binomial model. |    |    |    |    |    |     |
